# Supplementary material for: Past and future of the Arctic sea ice in HighResMIP climate models
Source: Copernicus journal article supplement (doi:10.5194/egusphere-2023-1411), 2023-07-13
Supplement: Supplementary file [file egusphere-2023-1411-AC1-supplement.pdf]

Dear Editor and Reviewer,

We would like to thank you for your constructive comments and helpful suggestions, which substantially improve the quality of the manuscript. Answers to your comments are given in detail hereafter.

Reviewer comments are in blue, and are followed by our response (in black) that includes changes and/or additions to the text. All authors agree with the modifications made to the manuscript.

## Review report, Reviewer 1

Review Selivanova, Iovino, Cocetta: Past and future of the Arctic sea ice in HighResMIP climate models

General:

The authors use a sub-set of HighResMIP model (those that have been used as part of the EU-project PRIMAVERA) to investigate the effect on increasing ocean and atmosphere resolution on the representation of ice area and ice thickness/ volume in the Arctic and within Arctic sub-regions and their variability and past and future trends. The main finding is that increasing the resolution does not lead to a robust signal in the analysed sea ice parameters across the investigated models.

The article is generally clearly structured and easily understandable, and also the figures are easy understandable. Not all the presented results are entirely new, mainly because high resolution often does not show substantially changes in the results and thus studies based on historical and future simulations with “standard-resolution” CMIP6 models have shown comparable results. However, there are still sufficient new and interesting results, which would justify a publication after some additional analysis and clarifications.

### Major points:

1. The authors are not discussing the role of internal variability, and how it might affect differences between low and high-resolution versions of the models. Since only one member of each model configuration is analysed, internal variability itself can lead to large differences in both mean values and trends (compare for example results from Swart et al. 2015, Jahn et al. 2016 using single-model large ensembles or Karami et al. 2023 looking at long term internal variability), and internal variability can probably explain quite a part of the differences between the low and high resolution versions - at least for some parameters and regions. Internal variability might also be a contributing factor to the opposite response to increasing resolution that has been found in the different models, where the authors so far state that the response to increasing resolution depends on the model.

To solve this problem, authors could either include more HighResMIP models into their

analysis to investigate if more models show the same response to increasing resolution, or they could include all existing model members of the models they used in their analysis to find a more robust response in each single model. At the least, the authors should use proper significant tests to find out if the differences that have been found between LR and HR versions of the models are statistically significant.

We agree with the reviewer that internal variability might explain part of the differences between low- and high-resolution configurations. However, a clear assessment of internal variability is not feasible in the context of this paper. Only three models within HighResMIP provide multiple ensemble members (ECMWF, EC-Earth3P and CNRM) for the hist-1950 experiments; only two models of those have multiple members for the highres-future experiments (ECMWF does not provide model outputs for the future runs). Additionally, EC-Earth3P and CNRM have only 3 members which might be not sufficient to capture internal variability, yet. Unfortunately, we cannot overcome the limitation due to model data availability shared with most of the recent studies using CMIP6 HighResMIP. For example, Docquier et al. (2019), Docquier et al. (2022), Koenigk et al. (2019) use ensemble-means only for ECMWF model and the first member for other models. Huang et al. (2021), Belucci et al. (2021), Tsartsali et al. (2022) use only the first member for each model.

2. Linked to the internal variability: At certain places the manuscript gives the impression (but I hope this was only somewhat misleading formulated) that the authors expect that global coupled models should be able to represent observed extremes. For example, they state that none of the models is able to reproduce the observed sea ice minima in 2007 and 2012 (section 3.4). Due to internal variability, we can never expect that a coupled model will represent a certain extreme in a certain year in long-term historical and future simulations as performed in CMIP6 / HighResMIP. Also, in section 3.4, the authors correlate annual sea ice values from the models with the satellite data to investigate how well the interannual variability is represented. If this is really what has been done (if I misunderstood please clarify what really has been correlated), this analysis must be removed because for the same reason as historical coupled model simulations cannot reproduce observed extremes at the observed time, they cannot represent observed interannual anomalies. That the correlations for SIV nevertheless provide relatively high values might be due to similar trends in satellite data and models – in case no detrending has been done before the correlation (even this should be clarified).

Thank you for the comment, we agree with your point. In the section 3.4, we correlated monthly anomalies from the model outputs and the satellite data. No detrending was done before the correlation. The part on the correlation analysis is removed from the section 3.4.

3. I am a bit puzzled by the regional results in section 3.3. Figure 5 shows large differences (up to 10-15%) in sea ice area between models in e.g. CA, LV, ESS even in winter when we

would expect that ice concentration is rather close to 100%. To me it seems that the area of the same sub-region is of different size in the different models. If you look at Figure 5 you will see that the sea ice area in models often is not changing at all between late autumn and spring, which indicates that the maximum ice area for this region has been reached. And if not the max sea ice concentration in some of the models have been hard-coded to 90 or less percent, then the area of the region just has to be smaller in those models which show a much smaller sea ice area. This would be a major issue since then the ice areas/ volumes from the different models and between models and satellite data and maybe even between the same model in different resolution cannot be compared. For proper comparison all model and observational data sets should be interpolated to the same grid and it has to be ensured that land-sea masks are comparable between the models.

Please explain more in detail how you calculated the area of the regions and carefully check all results in section 3.3, and if necessary update them.

The sea-ice area is the product of sea-ice concentration and grid-cell area, summed over all grid cells north of XXN. The grid cell area is computed on the model native grid, without applying any interpolation scheme. We followed the same approach by Docquier et al. (2019, 2020) in a similar analysis of SIA from HighResMip simulations. All the models, except MPI-ESM, employ the tripolar ORCA grid. Both model configurations of MPI-ESM used in this study employ the same ocean/ice tripolar grid. Model grids at different resolutions from the same model show small differences. Only the HadGEM3 model has a slightly larger error since sea ice concentration is provided on the atmosphere grid. The difference in ocean area north of 40°N is 3.9% between HadGEM3-MM and HadGEM3-LL when the atmosphere grid is used (as also showed in Docquier et al., 2019). It might contribute to the high bias in the winter SIA representation in some regions.. About the CA region, the bias is observed only for MPI-ESM model and it can be attributed to the different (not ORCA-like) tripolar model grid.

Minor points:

1. The HighResMIP-protocol foresees that differences between high and low resolution versions should be kept to a minimum, however, some models include automatized adaptations of parameter values to the resolution, other model groups had to make some small modifications to make the model running properly at high resolution. Further, the LR-versions normally were tuned and the HR-versions not at all. While this is in line with the HighResMPI-protocol, an untuned model might lead to substantial net surface and top of the atmosphere net energy imbalances, which leads to drifts and could affect the response of the climate.

I suggest to shortly mention that these factors might also contribute to the response to increasing the resolution.

Thank you for your suggestion. We included it in the discussion. “And finally, part of the differences between the low and high resolutions might be explained by the parameter adaptation to the grid size and small modifications between different model configurations. Furthermore, the low-resolution configurations are more carefully tuned in CMIP exercise compared to high-resolution versions. That can lead to drifts and consequently impact the climate response”.

2. Line 31-33: The sentence is formulated such as it sounds as the strongest trend is in September and the 2nd strongest in March. But I guess what is meant is that the strongest trend is in September and the lowest trend is in March. Please check and clarify.

Yes, the sentence was poorly formulated. We rephrased it.

3. Line 50: ‘...no significant changes in the area of the Arctic MIZ...’ But the position of the MIZ changed? If yes, maybe worth to mention.

It is true - the position of the MIZ is changed (Rolph et al., 2018) but in this sentence, we stress out the difference between the absolute MIZ area and the proportion of the MIZ in the total SIA which implies changes in the average MIZ position.

4. Line 98/99: ‘For the past, sea ice properties ...’ This sentence is badly placed here. I suggest to remove it here and mention the period else where (e.g. around line 112).

Thank you for this suggestion. The sentence is moved to the beginning of the next paragraph.

5. Table 1: Since the focus is on sea ice, it might make sense to compare some basics of the sea ice model and sea ice parameterizations as well.

The setup and physical choices of the sea ice model and all other components of the climate system affect our results and conclusions. This comparison is anyway out of the scope of this study. Furthermore, detailed description of the sea ice model physics and parameterizations is not available for all model configurations and models.

6. Line 152: ‘...does not change significantly ...’. Please clarify how you calculated the significance.

We corrected the sentence.

7. Line 159: ‘Configurations with finer ocean resolution have a better fit to CDR ...’ How do you estimated this? By eye? Except for the ECMWF-model, I have difficulties to clearly see this.

We agreed that the comparison was not clear enough. We removed the sentence.

8. Line 172: It seems that a number of models simulate despite too thick ice, too small ice concentrations compared with satellite data. I think this could be an important finding for guiding sea ice model improvements and their tuning, and should be mentioned somewhere,

e.g. in the discussion or conclusion section.

In the same context, see also Fig. 3, some models, particularly, both CMCC-versions, EC-Earth3P-HR and ECMWF simulate the ice edge pretty well (and the ice area) but SIT (and ice volume) is much too large. Normally, I would expect that too thick ice should be to a certain degree linked to too large ice areas as well but this does not really seem to be the case. Do you have any explanation for this piling up of sea ice in the Arctic? Sea ice model shortcomings? Too strong lateral melting? Or too strong Beaufort Gyre keeping all the ice in the Central Arctic?

Thank you for the comment. We do agree that the overestimation of ice thickness can be attributed to a combination of thermodynamics and dynamics processes, and interplay with ocean/atmosphere system. We have here only analysed “classical” ice variables as distributed from the modeling centers. Analysis on the physical sources of differences, beside the changes in grid resolution, is not a main question of this study. We leave this investigation for further studies.

9. Line 184: Models tend to have the SIA minimum too early, several already in August. Maybe worth to mention.

Most models and the reference products have similar values in August and September but the annual minimum occurs in September.

10. Line 219-221: The two sentences are saying more or less the same. I suggest merging them to one, e.g.: It is worth noting that the evaluation of the simulated MIZ area is highly dependent on the reference product used, particularly in summer.

The sentences are merged into one single sentence following your suggestion.

11. Line 292-295: It is not surprising that models agree in winter sea ice area better than in summer ice area in Arctic Ocean areas since in winter the Arctic Ocean is entirely ice covered. In summer, winter/ spring thickness is one important factor for how quickly the area is getting ice free and certainly differences between models in summer atmospheric circulation and temperature play a major role as well. I am sure heat input (and volume input) of rivers also matters in reality, however, I am not aware, that any of the models explicitly simulates temperature of the inflowing river water. Do not most models use the ocean temperature at the river mouth/ ocean points where the runoff enters the ocean? If you would like to state that the heat input from rivers is the main reason for the summer spread across models, please provide more details on how the different models differ in terms of their river representation and how large the difference in terms of heat-input into the Arctic from rivers is between models.

Thank you for your comment. The river schemes among these climate models are different and can employ different parameters and physical complexity. In deep analysis of river input is not included into this study also because we do not have detailed informations and output

from this component of any single runs. Our speculation is not scientifically based on numerical results, then we rephrased the sentence. “This could be possibly associated with the model differences in simulating atmospheric circulation, as well as representation of the river discharge (Park et al., 2020) and the transport of Pacific waters through the Bering Strait (Watts et al., 2021), which modify the thermo-haline structure of the upper-ocean and affect sea ice growth and melt”.

12. Section 3.3: The rather lengthy description in this section is partly a bit difficult to follow. A table - for at least SIA - showing winter (March) and summer (September) ice area for each region in each model and in satellite data would help.

We add the table in the section 3.3 as you suggested.

13. Line 349: EC-Earth3P-HR simulates much thicker ice than the LR-version. This is likely explaining why the trend in ice area is smaller.

Thank you for you comment. We added it into the text “Here, the exception is EC-Earth3P in which the eddy-permitting configuration has a larger negative trend in SIV (-322 and -460 km<sup>3</sup> yr<sup>-1</sup>). This might be attributed to the thicker ice simulated in HR configuration (Figure 2)”.

Technical corrections:

Line 98: Add ‘8.5’ to SSP5-scenario: SSP5-8.5.

Line 130 ‘north’ instead of ‘North’

Line 170: ‘addition’ instead of ‘Addition’

Line 408: I suggest to change ‘14 models’ with ‘14 simulations’ , since only 6 different models are used.

All technical corrections are done.
